# Supplementary material
Source: PubMed Central journal article supplement (PMC7391176)

## Supplementary Online Content

Whisenant B, Kapadia SR, Eleid MF, et al. One-year outcomes of mitral valve-in-valve using the SAPIEN 3 transcatheter heart valve. *JAMA Cardiol*. Published online July 29, 2020.  
doi:10.1001/jamacardio.2020.2974

**eTable 1.** Missing baseline characteristic values

**eTable 2.** Predictors of 1-year all-cause mortality

**eTable 3.** Baseline characteristics of patients who received 20mm/23mm valves and 26mm/29mm valves

**eFigure 1.** Study flowchart of patients who underwent SAPIEN 3 TMViV procedures

**eFigure 2.** Patient status

**eFigure 3.** Number of SAPIEN 3 MViV cases and sites by year

**eFigure 4.** Quality of life outcomes

**eFigure 5.** Cumulative event rate of all-cause mortality at 1 year in patients with MViV stratified by STS score

**eFigure 6.** Mitral mean gradient and all-cause mortality by valve size to 1 year

**eFigure 7.** 30-day mortality by year

This supplementary material has been provided by the authors to give readers additional information about their work.

**eTable 1. Missing Baseline Characteristic Values**

| <b>Characteristic</b>                | <b>Missing Rate<br/>% (No./Total)</b> |
|--------------------------------------|---------------------------------------|
| Age                                  | 0% (0/1529)                           |
| BMI                                  | 0.72% (11/1529)                       |
| Male                                 | 0% (0/1529)                           |
| Prior PCI                            | 0.2% (3/1529)                         |
| Prior CABG                           | 0.26% (4/1529)                        |
| Prior Stroke                         | 0.13% (2/1529)                        |
| Carotid Stenosis                     | 34.53% (528/1529)                     |
| Hypertension                         | 0% (0/1529)                           |
| Diabetes Mellitus                    | 0.2% (3/1529)                         |
| Chronic Lung Disease                 | 0.85% (13/1529)                       |
| Immunocompromise Present             | 0.07% (1/1529)                        |
| Porcelain Aorta                      | 0.13% (2/1529)                        |
| Atrial Fibrillation/Flutter          | 0.07% (1/1529)                        |
| Hemoglobin                           | 0.26% (4/1529)                        |
| Creatinine                           | 0.33% (5/1529)                        |
| Prior MI                             | 0.13% (2/1529)                        |
| Heart Failure within 2 Weeks         | 0% (0/1529)                           |
| NYHA within 2 Weeks                  | 1.24% (19/1529)                       |
| Approach                             | 0% (0/1529)                           |
| Average Six Minutes Walk Test Result | 58.99% (902/1529)                     |
| Mitral Insufficiency(MR)             | 1.5% (23/1529)                        |
| Mitral Mean Gradient                 | 7.52% (115/1529)                      |
| LVEF (%)                             | 1.5% (23/1529)                        |
| Mitral Stenosis                      | 2.35% (36/1529)                       |
| Tricuspid Insufficiency(TI)          | 0.39% (6/1529)                        |
| KCCQ                                 | 20.93% (320/1529)                     |

**eTable 2. Predictors of 1-Year All-Cause Mortality**

|                                            | Univariate          |         | Multivariate        |         |
|--------------------------------------------|---------------------|---------|---------------------|---------|
|                                            | HR 95% CI           | P Value | HR 95% CI           | P Value |
| <b>Baseline Covariates</b>                 |                     |         |                     |         |
| Transseptal vs Transapical                 | 0.67 [0.47-0.97]    | 0.0337  | 0.58 [0.37-0.9]     | 0.0145  |
| Baseline KCCQ overall score                | 0.98 [0.97-0.99]    | <0.0001 | 0.98 [0.97-0.99]    | 0.0021  |
| Baseline GFR (mL/min/1.73 m <sup>2</sup> ) | 0.98 [0.98-0.99]    | <0.0001 | 0.98 [0.97-0.99]    | <0.0001 |
| Cardiogenic shock within 24 hrs            | 6.13 [4.18-8.98]    | <0.0001 | 2.28 [1.14-4.57]    | 0.0202  |
| Mod/Sev tricuspid insufficiency            | 1.54 [1.13-2.1]     | 0.006   | 1.81 [1.16-2.84]    | 0.0096  |
| Mod/Sev mitral insufficiency               | 0.68 [0.51, 0.92]   | 0.0122  | 0.58 [0.40, 0.85]   | 0.0053  |
| Permanent pacemaker                        | 1.74 [1.29, 2.35]   | 0.0003  | 1.76 [1.19, 2.60]   | 0.0044  |
| Prior PCI                                  | 1.51 [1.06, 2.15]   | 0.0209  | 1.94 [1.24, 3.03]   | 0.0038  |
| <b>Procedural Covariates</b>               |                     |         |                     |         |
| Perforation with/without tamponade         | 21.56 [12.19-38.15] | <0.0001 | 70.58 [28.51-174.7] | <0.0001 |
| Conversion to Open Heart Surgery           | 9.01 [4.61-17.62]   | <0.0001 | 3.59 [1.34-9.62]    | 0.0109  |
| Procedure duration                         | 1.01 [1.00, 1.01]   | <0.0001 | 1.00 [1.00, 1.01]   | 0.0002  |

**eTable 3. Baseline Characteristics of Patients who Received 20mm/23mm Valves and 26mm/29mm Valves.**

| Characteristic                    | No./Total (%) of Patients       |                                  |         |
|-----------------------------------|---------------------------------|----------------------------------|---------|
|                                   | 20 mm + 23 mm Valves<br>(n=122) | 26 mm + 29 mm Valves<br>(n=1407) | P Value |
| Male                              | 21/122 (17.2)                   | 604/1407 (42.9)                  | <0.0001 |
| BSA, mean (SD)                    | 1.7 (0.35)                      | 1.8 (0.24)                       | 0.01    |
| STS, mean (SD)                    | 13.3 (9.45)                     | 10.9 (8.61)                      | 0.003   |
| Hemoglobin, mean (SD)             | 11.0 (1.92)                     | 11.4 (2.11)                      | 0.03    |
| MDRD GFR, mean (SD)               | 50.0 (25.38)                    | 55.5 (25.81)                     | 0.02    |
| Currently on Dialysis             | 11/122 (9.0)                    | 71/1406 (5.0)                    | 0.06    |
| LVEF, mean (SD)                   | 57.1 (11.43)                    | 54.6 (12.10)                     | 0.03    |
| Cardiogenic shock within 24 hours | 10/122 (8.2)                    | 53/1406 (3.8)                    | 0.02    |
| Tricuspid Regurgitation (mod/sev) | 79/122 (64.8)                   | 769/1401 (54.9)                  | 0.04    |
| Mitral annular calcification      | 29/49 (59.2)                    | 240/556 (43.2)                   | 0.03    |

**eFigure 1. Study Flowchart of Patients who Underwent SAPIEN 3 TMViV Procedures**

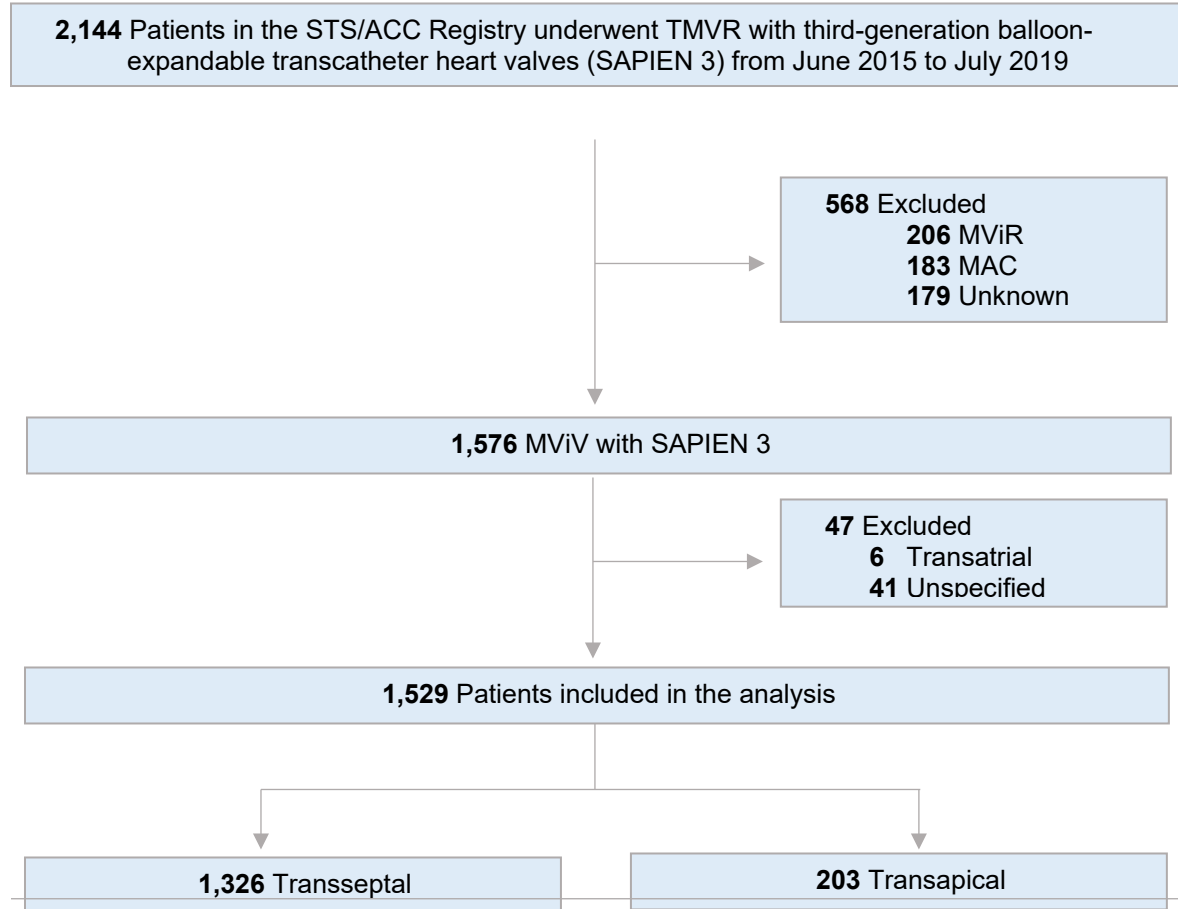

Abbreviations: TMVR, transcatheter mitral valve replacement; MViR, mitral valve-in-ring; MAC, mitral annular calcification, MViV, mitral valve-in-valve

## eFigure 2. Patient Status

The numbers of 1-year follow-up status (visit completed, death, lost to follow-up, unknown, and visit not due) in MVIV patients with transeptal and transapical approaches at 30-day and 1-year are shown respectively. Additional events of death at 1 year was detected by CMS-linkage.

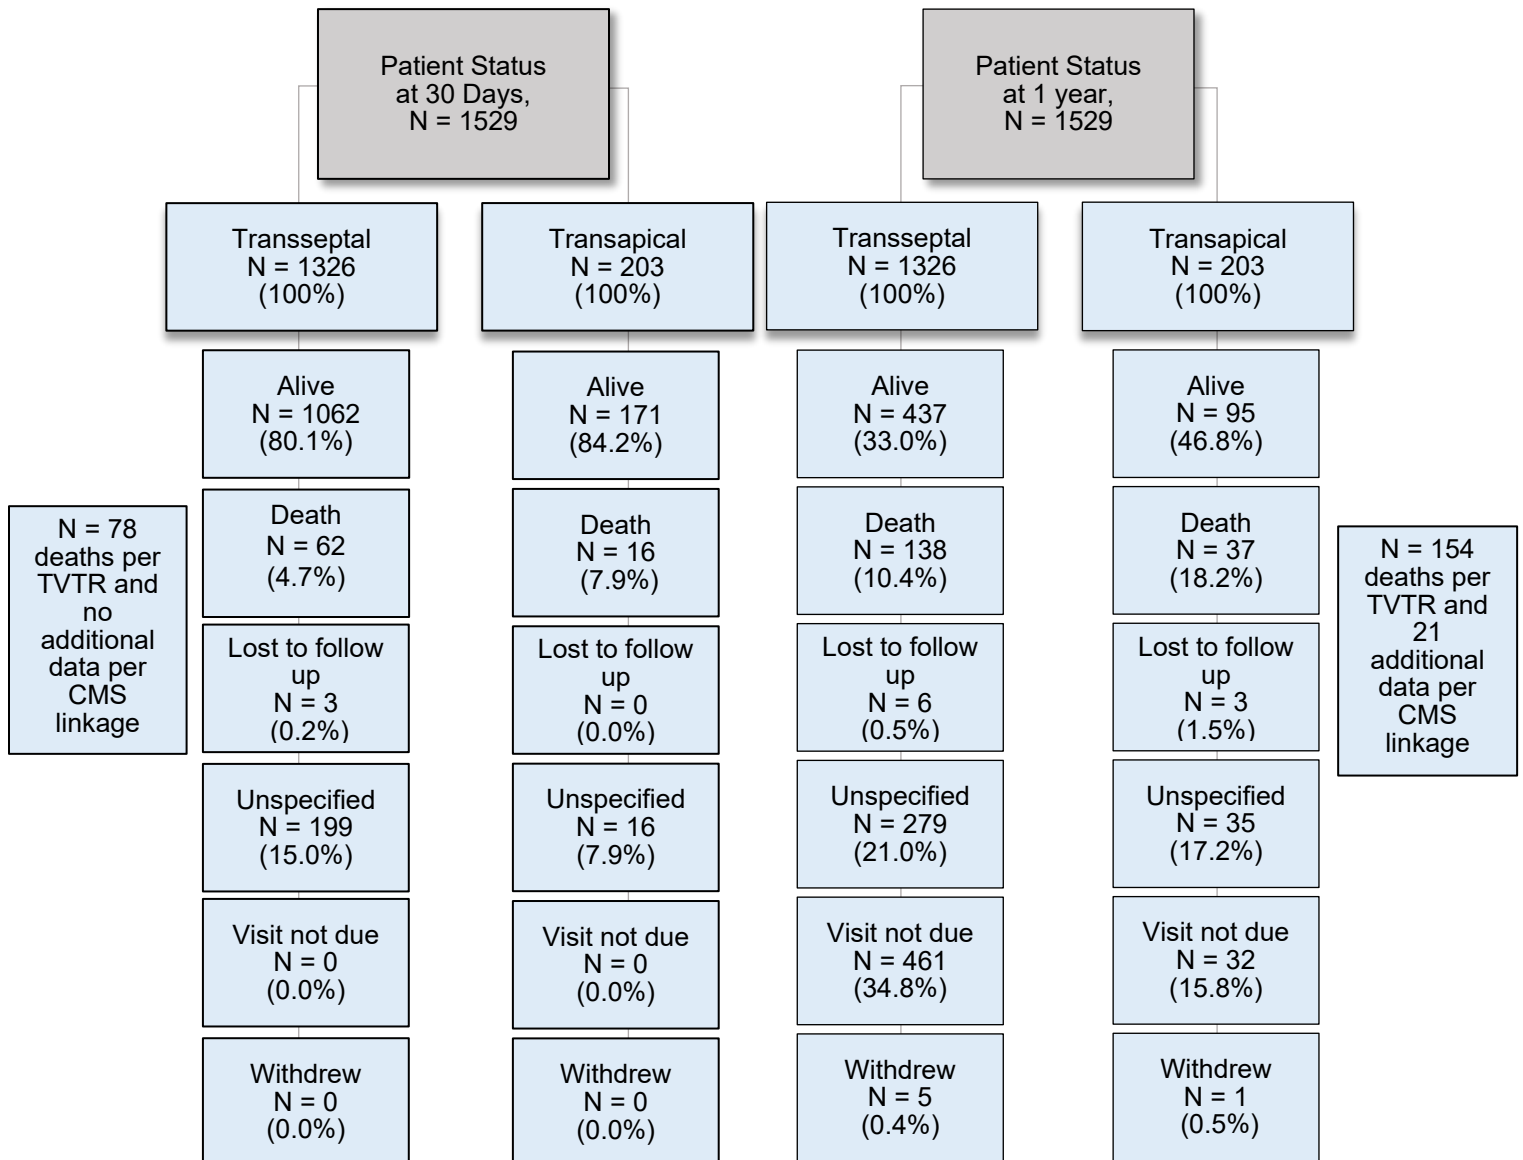

**eFigure 3. Number of SAPIEN 3 MViv Cases and Sites by Year.**

A, Number of mitral ViV cases and number of sites from second half of 2015 to 2018 are presented. B, Number of mitral ViV cases for each site presented.

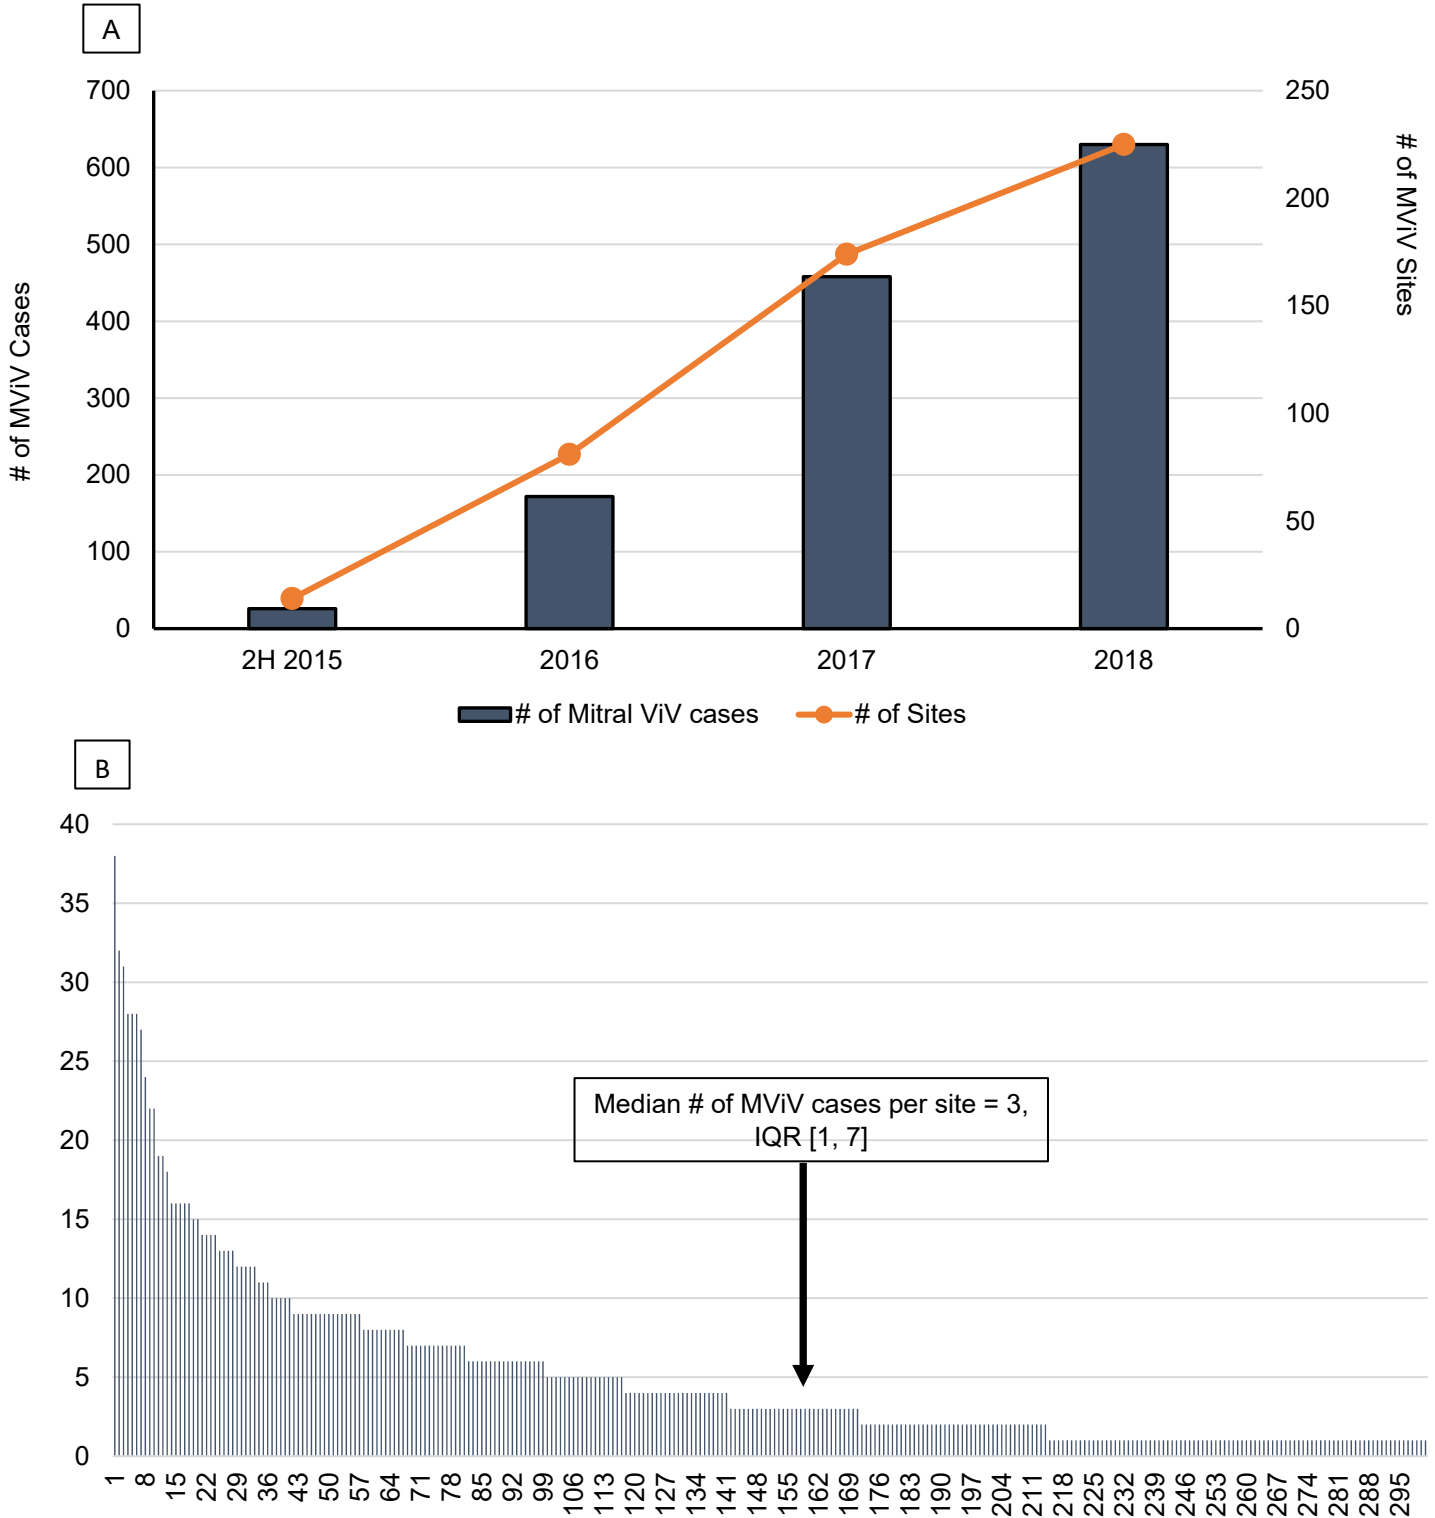

**eFigure 4. Quality of Life Outcomes.**

Quality of life scores, as measured by KCCQ-12, are shown below at baseline, 30-day and 1-year with significant improvements from baseline to 30-day and baseline to 1-year.

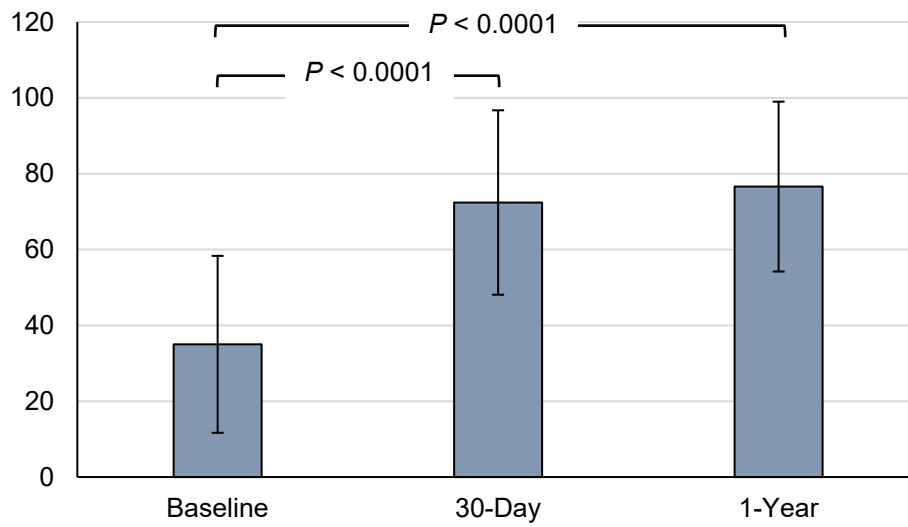



**eFigure 5. Cumulative Event Rate of All-Cause Mortality at 1-Year in Patients with MViv Stratified by STS score.**

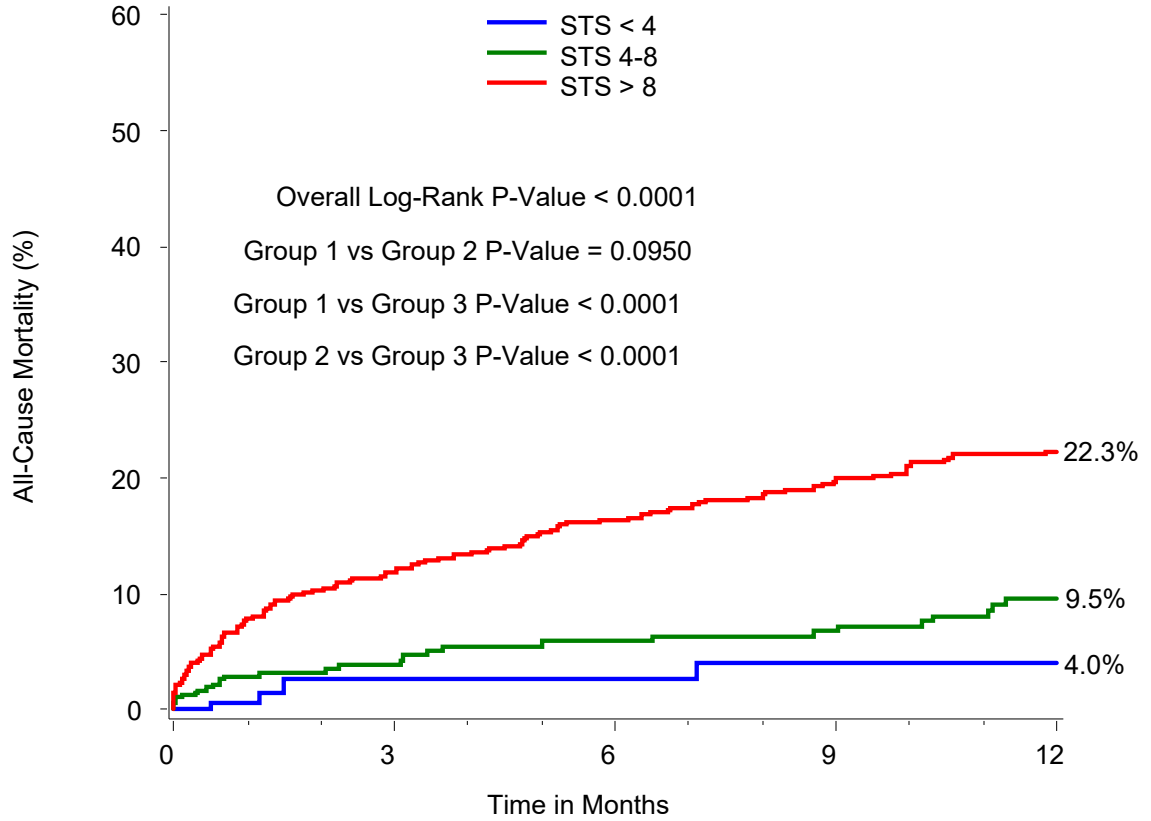

Number at risk:

|         |     |     |     |     |     |
|---------|-----|-----|-----|-----|-----|
| STS < 4 | 166 | 73  | 70  | 63  | 48  |
| STS 4-8 | 477 | 243 | 227 | 212 | 168 |
| STS > 8 | 805 | 436 | 396 | 352 | 288 |

### eFigure 6. Mitral Mean Gradient and All-Cause Mortality by Valve Size to 1-Year

A, Mitral mean gradients are presented over time to 1-year in patients who received larger valves (26, 29 mm) compared to smaller valves (20, 23 mm).

B, All-cause mortality are presented over time to 1-year in patients who received larger valves (26, 29 mm) compared to smaller valves (20, 23 mm).

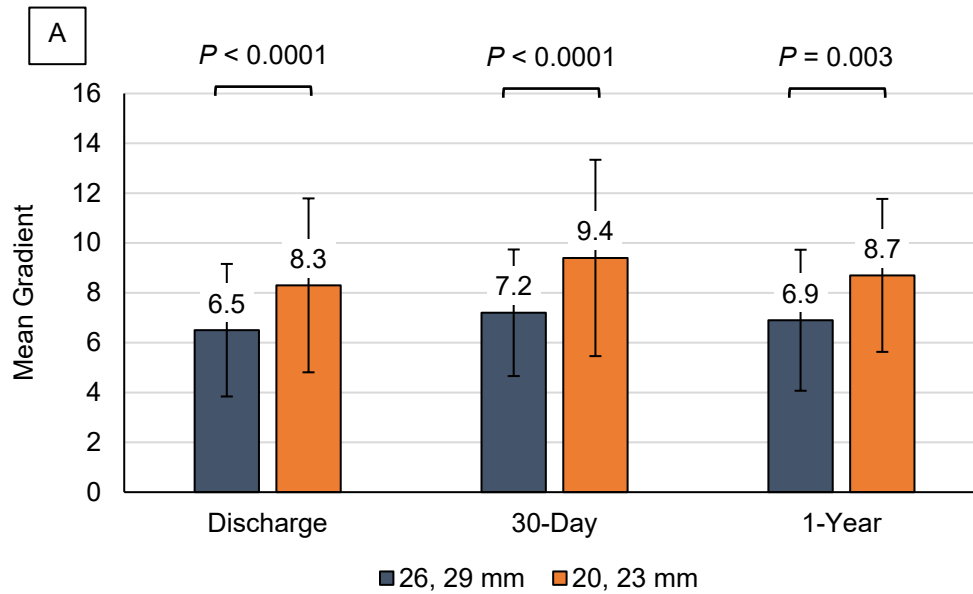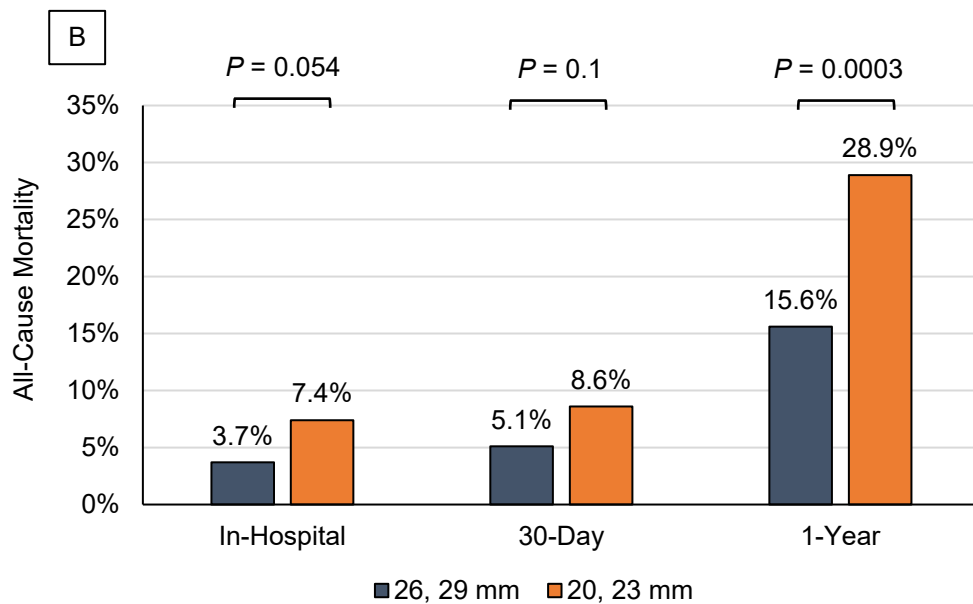

### eFigure 7. 30-Day Mortality by Year

A longitudinal analysis has demonstrated diminished 30-Day mortality in mitral valve-in-valve procedures with each successive year since 2015. A major inflection point roughly coincides with FDA approval of the SAPIEN 3 valve and a transition from TA to TS procedures.

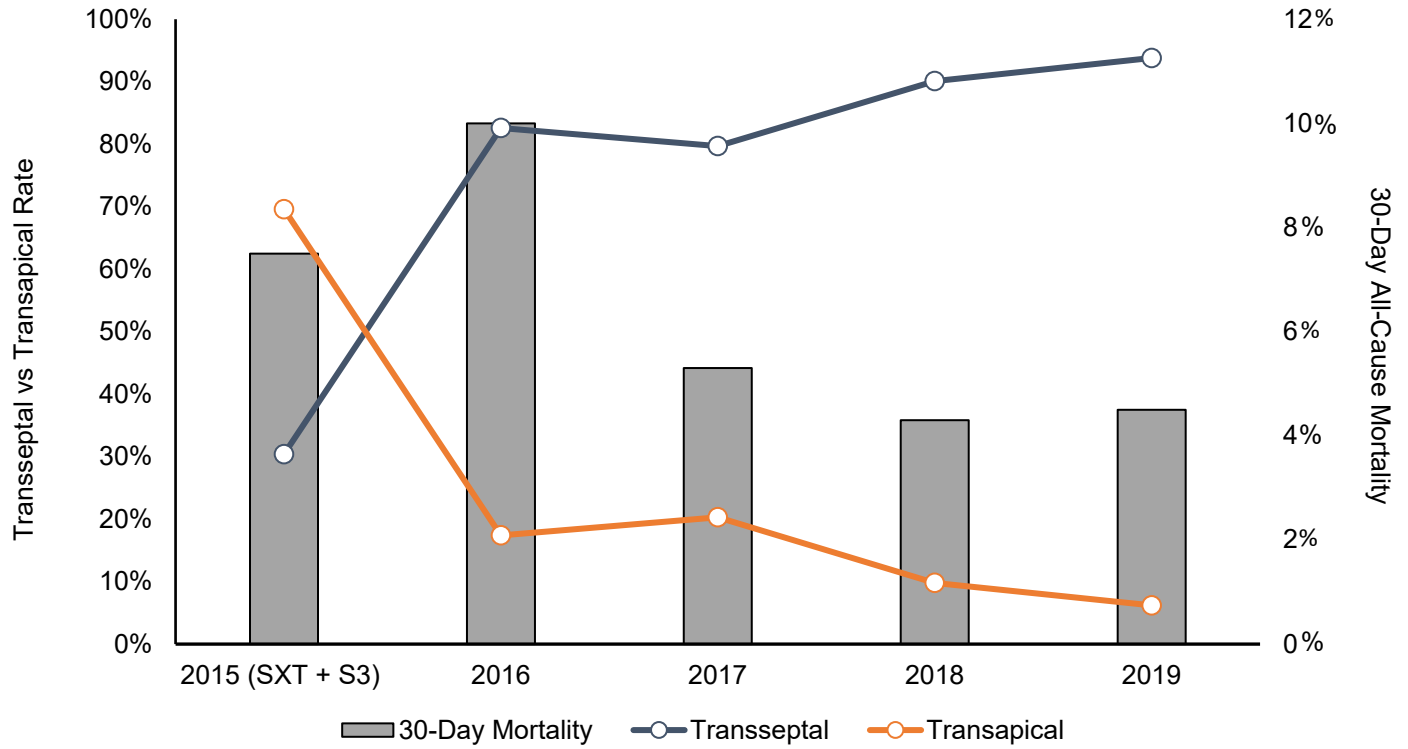

Supplement: jamacardiol-e202974-s001.pdf [file jamacardiol-e202974-s001.pdf]
